# Supplementary material for: Pressure-induced tunable emission colors and irreversible bandgap narrowing in organic–inorganic manganese bromide hybrids
Source: Royal Society of Chemistry journal article supplement (doi:10.1039/d4tc03814b), 2024-11-09
Supplement: d4tc03814b1.pdf [file d4tc03814b1.pdf]

## Supporting Information

### Pressure-Induced Tunable Emission Colors and Irreversible Bandgap Narrowing in Organic–Inorganic Manganese Bromide Hybrid

Ruijing Fu,<sup>a, c</sup> Junpeng Gao,<sup>a</sup> Pinsen Zhang,<sup>a</sup> Lingrui Wang,<sup>b</sup> Bo Wang,<sup>a, c</sup> Guangxia Wang,<sup>a</sup> Xiaoshuang Li,<sup>\*a</sup> Youchao Kong,<sup>\*c</sup> Qingguang Zeng<sup>\*a, c</sup> and Guanjun Xiao<sup>\*d</sup>

<sup>a</sup> School of Applied Physics and Materials, Wuyi University, Jiangmen 529020, P. R. China.

E-mail: [ruijingfu\\_wyu@163.com](mailto:ruijingfu_wyu@163.com); [lixiaoshuang12@mails.ucas.ac.cn](mailto:lixiaoshuang12@mails.ucas.ac.cn); [zengqg1979@126.com](mailto:zengqg1979@126.com)

<sup>b</sup> Key Laboratory of Materials Physics of Ministry of Education, Zhengzhou University, Zhengzhou 450052, P. R. China

<sup>c</sup> Department of Physics and Electronic Engineering, Yancheng Teachers University, Yancheng 224002, P.R. China

E-mail: [yb87816@connect.um.edu.mo](mailto:yb87816@connect.um.edu.mo)

<sup>d</sup> State Key Laboratory of Superhard Materials, College of Physics, Jilin University, Changchun 130012, China

E-mail: [xguanjun@jlu.edu.cn](mailto:xguanjun@jlu.edu.cn)

<sup>e</sup> Institute of Carbon Peaking and Carbon Neutralization, Wuyi University, Jiangmen 529020, Guangdong Province, P. R. China

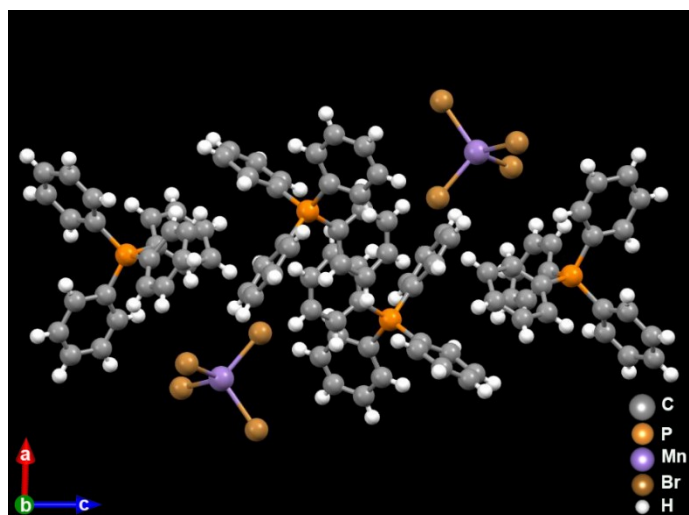

**Fig. S1.** The crystal asymmetric structure of 0D  $(C_{24}H_{20}P)_2MnBr_4$ .

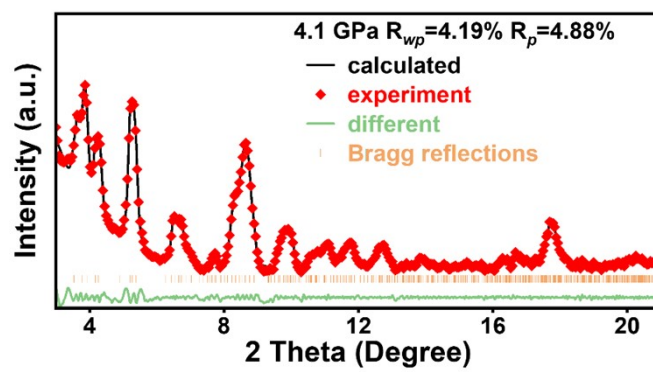

**Fig. S2.** The refinements ADXR D spectra of  $(C_{24}H_{20}P)_2MnBr_4$  SCs at 4.1 GPa.

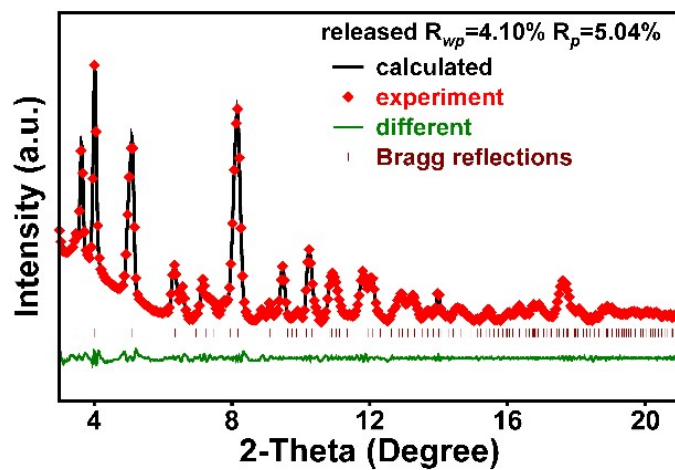

**Fig. S3** The refinements released ADXR D spectra of  $(C_{24}H_{20}P)_2MnBr_4$  SCs.

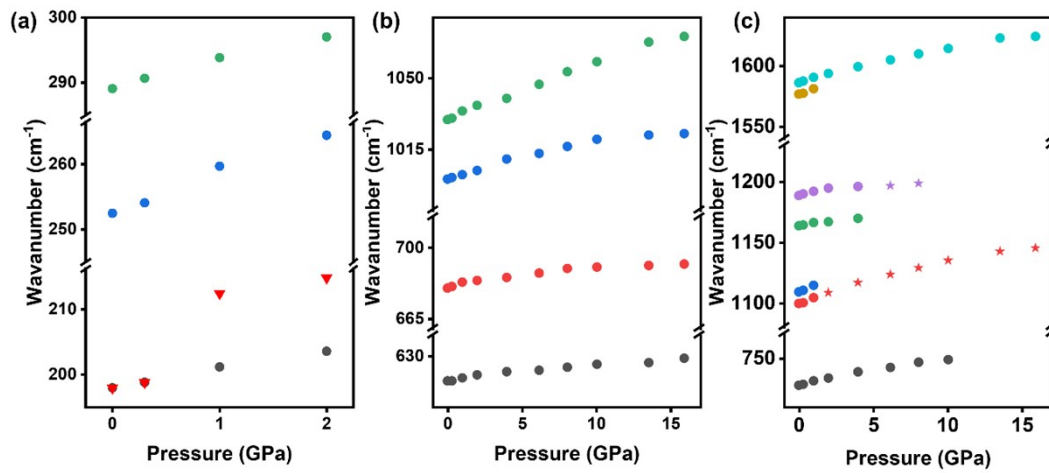

**Fig. S4.** The representative corresponding frequency shifts (a-c) of  $(\text{C}_{24}\text{H}_{20}\text{P})_2\text{MnBr}_4$  SCs from 1atm to 20.0 GPa.

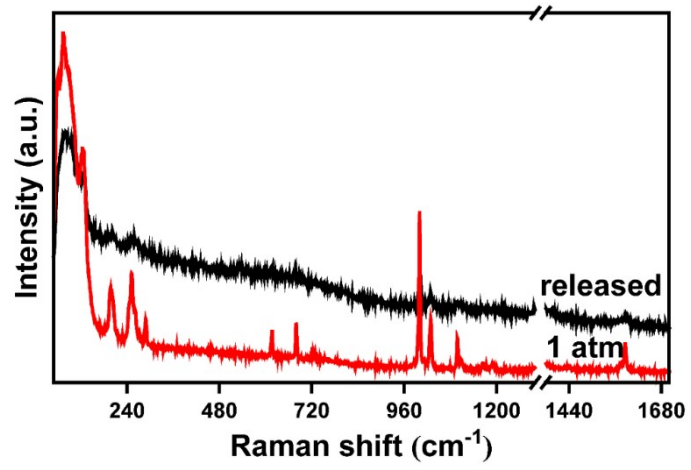

**Fig. S5.** The Raman spectra of  $(\text{C}_{24}\text{H}_{20}\text{P})_2\text{MnBr}_4$  SCs at 1 atm and released from 20.0 GPa.

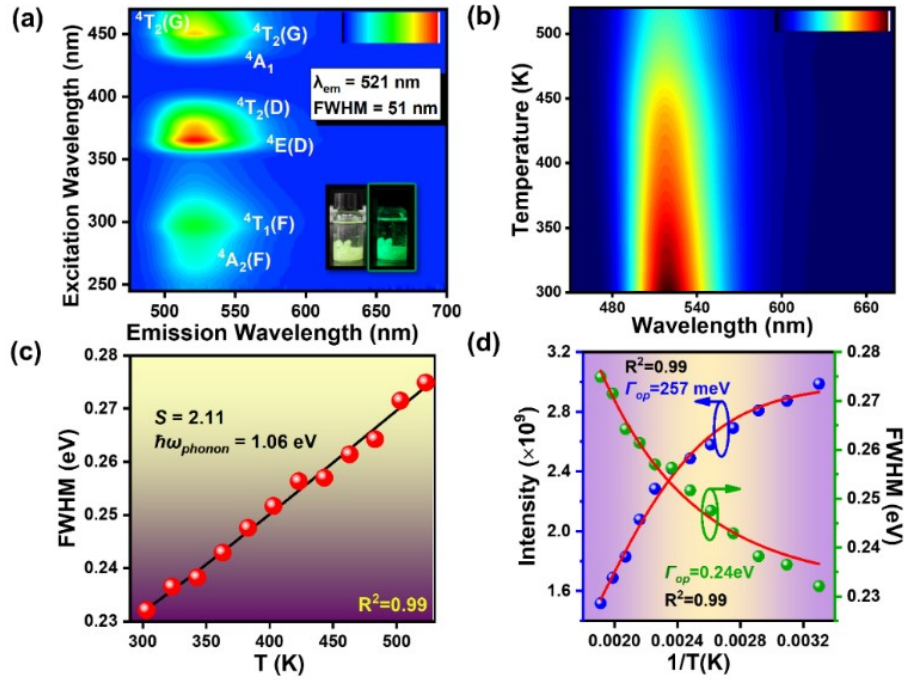

**Fig. S6** (a) PLE spectra of  $(C_{24}H_{20}P)_2MnBr_4$  SCs from 250 to 470 nm. (b) Temperature-dependent PL spectra within the temperature range of 300-520 K of  $(C_{24}H_{20}P)_2MnBr_4$  SCs. (c)  $S$  and  $\hbar\omega_{phonon}$  values for  $(C_{24}H_{20}P)_2MnBr_4$  SCs through fitting the FWHM with temperature data. (d) Value of  $\Gamma_{op}$  for  $(C_{24}H_{20}P)_2MnBr_4$  SCs by Toyozawa equation.

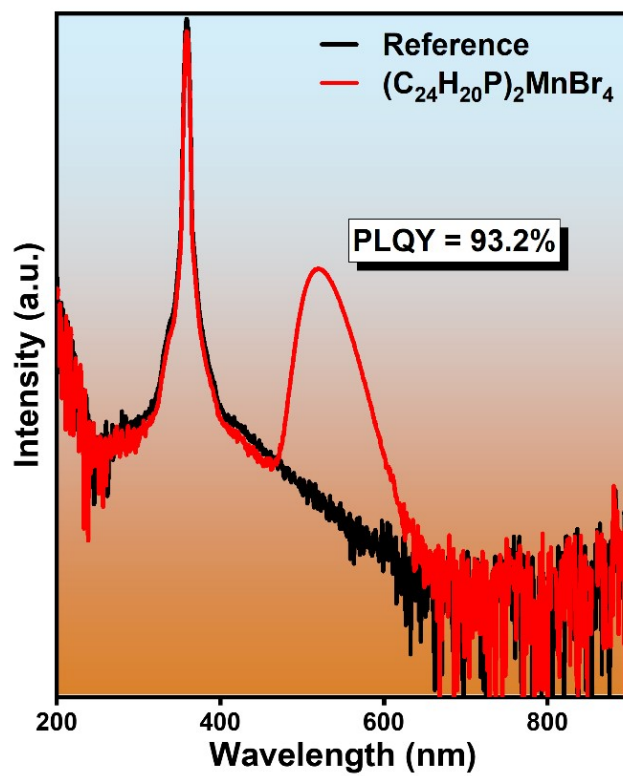

**Fig. S7.** The PLQY of  $(C_{24}H_{20}P)_2MnBr_4$  SCs exciting at  $\lambda_{ex} = 360$  nm.



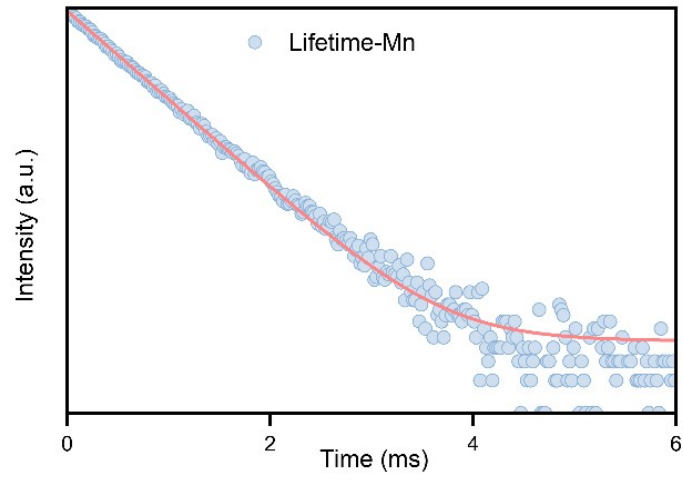

**Fig. S8.** The decay curve of  $(C_{24}H_{20}P)_2MnBr_4$  SCs.

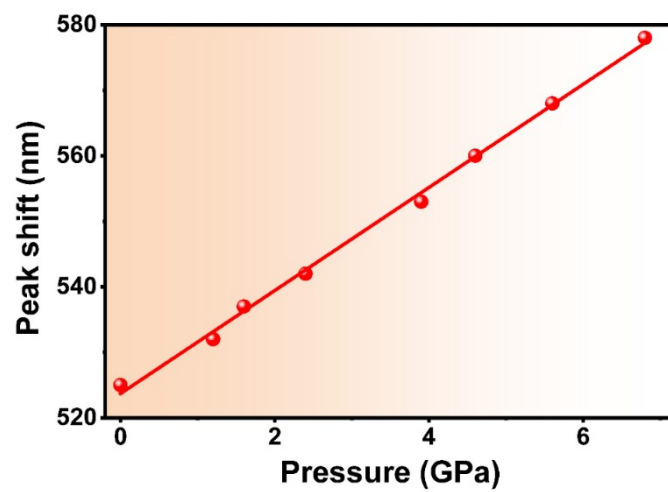

**Fig. S9** The PL shift of  $(C_{24}H_{20}P)_2MnBr_4$  SCs under different pressure.

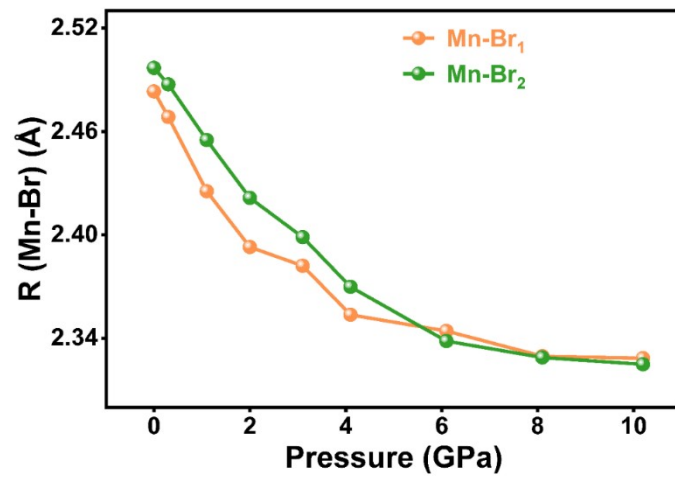

**Fig. S10.** The Mn-Br bond length changes as a function of pressure.

**Table S1.** The CIE chromaticity coordinates of  $(\text{C}_{24}\text{H}_{20}\text{P})_2\text{MnBr}_4$  SCs under different pressures.

| <b>Pressure (GPa)</b> | <b>x</b> | <b>y</b> |
|-----------------------|----------|----------|
| <b>0</b>              | 0.2607   | 0.5203   |
| <b>1.2</b>            | 0.2861   | 0.4773   |
| <b>2.4</b>            | 0.2776   | 0.5443   |
| <b>3.9</b>            | 0.2815   | 0.5852   |
| <b>4.6</b>            | 0.3198   | 0.5779   |
| <b>5.6</b>            | 0.3972   | 0.5470   |
| <b>6.8</b>            | 0.4210   | 0.5173   |
| <b>8.3</b>            | 0.4510   | 0.4657   |
| <b>9.8</b>            | 0.4117   | 0.3880   |
